SOFTWARE

# Granatum: a graphical single-cell RNA-seq analysis pipeline for genomics scientists

1 Xun Zhu<sup>1,2</sup>, Thomas Wolfgruber<sup>1,2</sup>, Austin Tasato<sup>3</sup>, Lana X Garmire<sup>1, 2\*</sup>

2 \_\_\_\_\_

3 \*Correspondence:

4 LGarmire@cc.hawaii.edu

5 1Graduate Program in Molecular  
6 Biology and Bioengineering,  
7 University of Hawaii at Manoa,  
8 Honolulu, HI 96816

9 2 Epidemiology Program, University  
10 of Hawaii Cancer Center, Honolulu,  
11 HI 96813

12 3 Department of Electrical  
13 Engineering, University of Hawaii at  
14 Manoa, Honolulu, HI 96816

15

## Abstract

**Background:** Single-cell RNA sequencing (scRNA-seq) is an increasingly popular platform to study heterogeneity at the single cell level. Computational methods to process scRNA-seq have limited accessibility to bench scientists, as they require significant amount of bioinformatics skills.

**Results:** We have developed Granatum, a web browser based scRNA-seq analysis pipeline to make analysis more broadly accessible to researchers. Without a single line of programming code, a user can click through the pipeline, setting parameters and visualizing results via the interactive graphical interface. The pipeline conveniently walks the users through various steps of scRNA-seq analysis. It has a comprehensive list of modules, including plate merging and batch effect removal, outlier sample removal, gene filtering, gene expression normalization, cell clustering, differential gene expression analysis, pathway/ontology enrichment analysis, protein network interaction visualization, and pseudo-time cell series construction.

**Conclusions:** Granatum enables much widely adoption of scRNA-seq technology by empowering the bench scientists with an easy to use graphical interface for scRNA-seq data analysis. The package is freely available for research use at: <http://garmiregroup.org/granatum/app>

**Keywords:** single-cell; gene expression; graphical; normalization; clustering; differential expression; pathway; pseudo-time; software

## 16 **Background**

17 The arrival of single-cell high-throughput RNA sequencing (scRNA-seq) has provided new  
18 opportunities for researchers to identify the expression characteristics of individual cells among  
19 complex tissues. This is a significant leap forward from bulk cell RNA expression analysis. In cancer,  
20 for example, scRNA-seq allows tumorous cells to be separated apart from healthy cells [1] and  
21 primary cells be differentiated from metastatic cells [2]. Single-cell expression data can also be  
22 used to describe trajectories of cell differentiation and development [3]. However, analyzing data  
23 from scRNA-seq brings new computational challenges, e.g., accounting for inherently high drop-  
24 out (artificial loss of RNA expression information) [4].

25 Software that has been developed to address these challenges may have very limited accessibility  
26 for biologists with only general computer skills, as they typically require the ability to use a  
27 computing language like R [5,6]. Other existing workflows that can be used to analyze scRNA-seq  
28 data, such as Singular (Fluidigm, Inc., South San Francisco, CA, USA), Cell Ranger/ Loupe  
29 (Pleasanton, CA, USA), and Scater [7] all require some non-graphical interactions and they may not  
30 provide a comprehensive set of scRNA-seq analysis methods. To fill this gap, we have developed  
31 Granatum, a fully interactive graphical scRNA-seq analysis tool. Granatum is the Latin word for  
32 pomegranate, which bears many seeds, resembling single cells within the entity. This tool employs  
33 an easy-to-use web browser interface for a wide range of methods suitable for scRNA-seq analysis:  
34 removal of batch effects, removal of outlier cells, normalization of expression levels, filtering of  
35 under-informative genes, clustering of cells, identification of differentially expressed genes,

36 identification of enriched pathways/ontologies, visualization of protein networks, and  
37 reconstruction of pseudo-time paths for cells. Our software will empower a much broader  
38 audience of research communities to study single cell complexity, by allowing them to readily  
39 explore single-cell expression data from a graphical user interface.

## 40 **Implementation**

### 41 **Overview**

42 Both the front-end and the back-end of Granatum are written in the R software language, and built  
43 with the Shiny framework [8]. Multiple concurrent users are handled by Shiny and each user works  
44 on its own data space. To protect the privacy of users, the data submitted by one user is not visible  
45 to any other user. The front-end is implemented as a web page with dynamically loaded pages,  
46 and is arranged in a step-wise fashion. The default theme uses the Bootstrap framework. ShinyJS  
47 [9] is used to power some of the interactive components. To allow users to redo a task, each  
48 processing step is equipped with a reset button.

### 49 **Interactive widgets**

50 The package visNetwork is used for the layout and physics simulation of the network modules [10].  
51 DataTables are used to preview user submitted data and to show tabular data in various modules  
52 [11]. Plotly is used for the interactive outlier identification step [12]. The package ggplot2 is used  
53 for the scatter-plots and box-plots, which is also used by the Monocle package for the Pseudo-time  
54 construction step [3,13].

## 55 **Back-end variable management**

56 The expression matrix and the metadata sheet are stored separately for each user. The metadata  
57 sheet can refer to groups, batches, or other properties of the samples in the corresponding  
58 expression matrix. These two types of tables are shared across all modules. Other variables shared  
59 across all modules include the log-transformed expression matrix, the filtered and normalized  
60 expression matrix, the dimensionally reduced matrix, species (human or mouse) and the primary  
61 metadata column.

## 62 **Batch-effect removal**

63 Batch-effect removal is done using the following procedure. First, we calculate the median  
64 expression of each sample, denoted as  $med_i$  for sample  $i$ . Second, we calculate the mean of  $med_i$   
65 for each batch, denoted as  $batchMean_b$  for batch  $b$ ,

$$batchMean_b = geometricMean_{i \in batch_b}(med_i).$$

66 Finally, each batch will be multiplied by a factor which pulls towards the global geometric mean of  
67 the sample medians, i.e., when  $i \in batch_b$  and  $m$  is the number of samples,

$$sampleNew_i = sampleOld_i \cdot \frac{geometricMean_{i \in 1, \dots, m}(med_i)}{batchMean_b}.$$

68 Where  $sampleNew_i$  and  $sampleOld_i$  denote the expression levels (vector) for all genes within  
69 sample  $i$  before (old) and after (new) batch-effect removal.

## 70 Clustering methods

71 The following description of clustering algorithms assumes  $n$  being the number of genes,  $m$  being  
72 the number of samples, and  $k$  being the number of clusters.

73 **Non-negative matrix factorization (NMF):** the log-transformed expression matrix ( $n$ -by- $m$ ) is  
74 factorized into two non-negative matrices  $H$  ( $n$ -by- $k$ ) and  $W$  ( $k$ -by- $m$ ) with  $k$  being the expected  
75 number of clusters. The latter matrix is then used to determine the membership of each cluster by  
76 determining, for each column in  $W$ , which of the  $k$  entries has the highest value [14,15]. The NMF  
77 computation is implemented in the NMF R-package, as reported earlier [14,16].

78 **K-means:** K-means is done on either the log-transformed expression matrix or the 2-by- $m$   
79 correlation t-SNE matrix. The algorithm is implemented by the *kmeans* function in R [17].

80 **Hierarchical clustering (Hclust):** Hclust is also done on either the log-transformed expression  
81 matrix or the 2-by- $m$  correlation t-SNE matrix. The algorithm is implemented by the *hclust* function  
82 in R [18]. The heatmap with dendrograms is plotted using the *heatmap* function in R.

## 83 Correlation t-SNE

84 Correlation t-SNE is implemented to assess heterogeneity of the data. It is calculated using a two-  
85 step process. First, a distance matrix is calculated using the correlation distance. The correlation  
86 distance  $D_{i,j}$  between sample  $i$  and sample  $j$  is defined as

$$D_{i,j} = 1 - \text{Correlation}(S_i, S_j),$$

87 where  $S_i$  and  $S_j$  are the  $i$ -th and  $j$ -th column (sample) of the expression matrix.

88 Next, t-SNE is performed using this distance matrix, which reduces the expression matrix to two  
89 dimensions. We use the Rtsne R package for this calculation [19].

## 90 **Elbow-point finding algorithm in clustering**

91 In the clustering module with automatic determination of the number of clusters, the  
92 identification of the optimum number of clusters is done prior to presenting the clustering results.  
93 First, we calculate the k-means clusters from  $k = 2$  to  $k = 10$ . For each  $k$ , we calculate the  
94 percentage of the explained variance (EV). To find the elbow-point  $k = m$  where the EV plateaus,  
95 we fit the  $k$ -EV data points with a linear elbow function. This function consists of a linearly  
96 increasing piece from 0 to  $m$ , and a constant piece from  $m$  to 10. We iterate from  $m = 1$  to 10 and  
97 identify  $m$  which gives the best coefficient of determination ( $R^2$ ) of linear regression as the "elbow  
98 point".

## 99 **Differential expression analysis**

100 We use SCDE (version 1.99.4) in our Differential expression (DE) analysis step. The minimum size  
101 entries parameter of the *scde.error.models* function is set to be the lesser of 2000 or the number  
102 of genes after filtering [20]. When more than two clusters are present, a pair-wise DE analysis is  
103 performed.

## 104 **Gene-set enrichment analysis**

105 The GSEA algorithm is implemented in the *fgsea* R-package which uses an optimized algorithm for  
106 fast calculation speed [21].

## 107 **Pseudo-time construction**

108 We use Monocle (version 2.2.0) in our pseudo-time construction step. When building the  
109 *CellDataSet* required for monocle's input, we set the *expressionFamily* to *negbinomial.size()*. The  
110 dimension reduction is done using the *reduceDimension* function with *max\_components* set to be  
111 2.

## 112 **Results**

### 113 **Overview and comparison with scRNA-seq pipelines**

114 Granatum is by far the most comprehensive tool web browser based scRNA-seq analysis pipeline  
115 without any programming requirement (Table 1). We have systematically compared Granatum  
116 with 12 other existing tools, to demonstrate its versatile functions. Among other tools, methods  
117 such as SCDE / PAGODA and Flotilla, are developed for programmers and requires expertise in a  
118 particular programming language. In contrast, Granatum with its simple graphical interface  
119 requires no programming knowledge, and is very easy to navigate through. Current version of  
120 Granatum neatly presents nine modules, arranged as steps and ordered by their dependency  
121 (Figure 1). It starts with one or more user-supplied expression matrices and corresponding sample  
122 metadata sheet(s), followed by data merging, batch-effect removal, outlier removal,  
123 normalization, gene filtering, clustering, differential expression, protein-protein network, and  
124 pseudo-time construction.

125 Comparing to other freely available tools, Granatum workflow has many superior functionalities  
126 that make it flexible (Table 1). Below we enlist some of them. (1) Unlike tools such as SCRAT  
127 (<https://zhiji.shinyapps.io/scrat/>), ASAP [22] and Sake (<http://sake.mhammell.tools/>), it is the only  
128 GUI pipeline that supports multiple dataset submission as well as batch effect removal; (2) at any  
129 point of the step, the user can reset the current step for re-analysis; (3) the user can bypass certain  
130 steps and still complete the workflow; (4) the user can select subsets of samples/data for their  
131 customized analysis need; (5) the user can identify outlier samples either automatically by a pre-



132 set threshold, or manually by simply clicking the samples the PCA plot or the correlation t-SNE  
133 plot; (6) the user can specify multiple cores in the differential expression module for speed-up; (7)  
134 Both GSEA and network analysis can be performed for the differentially expressed genes in all  
135 pairs of subgroups, following clustering analysis; (8) Monocle pseudo-time construction can be  
136 performed to gain insights of relationships between the cells. In the following sections, we  
137 elaborate the details of each step in Granatum in chronological order.

## 138 **Upload data**

139 Granatum accepts one or multiple expression matrices as the input. Each expression matrix can be  
140 accompanied by a table describing the groups, batches, or other properties of the samples in the  
141 corresponding matrix. This accompanying table is called the metadata sheet. Multiple matrices  
142 may be uploaded sequentially. The user also specifies the species of the data, either human or  
143 mouse, for downstream functional analysis. After the input files are uploaded, preview tables for  
144 the matrix and metadata are displayed, providing the user an opportunity check that the data they  
145 have input is as expected.

## 146 **Batch-effect removal**

147 Samples obtained in batches can create unwanted technical variation, which confound the  
148 biological variation [23]. It is thus important to remove the expression level difference due to  
149 batches. Granatum provides a batch-effect removal step, where the batches are shown as  
150 different colors in the box-plot (Figure 2). If more than one datasets are uploaded, by default each  
151 dataset is assumed to be one batch. Alternatively, if the batch numbers are indicated in the sample

152 metadata sheet, the user may select the column in which the batch numbers are stored (blue  
153 circled in Figure 2). For datasets with a large number of cells, to maintain legibility of the box-plot a  
154 random selection of 96 sub-samples is shown in the box-plot, and can be re-sampled freely.

## 155 **Outlier identification**

156 Computationally abnormal samples pose serious problems for many down-stream analysis  
157 procedures. It is thus crucial to identify and remove them in the early stage. Granatum's outlier  
158 identification step features PCA plot and t-SNE plot, two connected interactive scatter-plots that  
159 have different computational characteristics. A PCA plot illustrates the Euclidean distance between  
160 the samples, and a correlation t-SNE plot shows the associative distances between the samples.  
161 The interactive mode of these plots is realized by the Plotly library [12] (Figure 3A).

162 Outliers can be identified automatically by either using a z score threshold or setting a fixed  
163 number of outliers. In addition, the user can select or de-select each sample, by clicking, boxing or  
164 drawing a lasso on its corresponding points on either PCA or t-SNE plot (Figure 3A and 3B). This  
165 level of interaction from users is one of the many examples of thoughtful tool design, in order to  
166 empower them.

167 To help users select sample of a particular property, Granatum also allows for mapping any of the  
168 columns in the metadata sheet onto the scatter-plots (circled blue in Figure 3A). The complete  
169 metadata information of the selected samples can be found in a table at the bottom of the page  
170 (circled red in Figure 3A).

## 171 **Normalization**

172 Normalization is essential to most scRNA-seq data, except those with the UMI counts, before the  
173 down-stream functional analyses. The current version of Granatum has implemented three  
174 commonly used normalization algorithms: rescale to geometric mean, quantile normalization, and  
175 size-factor normalization [24,25]. A box-plot is shown post normalization, to help illustrate its  
176 effect to the median, mean, and extreme values across samples. As is the case in the batch-effect  
177 removal step, for a dataset with a large number of samples, 96 sub-samples are randomly chosen  
178 for the visualization purpose (Figure 3C).

## 179 **Gene filtering**

180 Due to scRNA-seq's relative high level of noise, it has been recommended to remove lowly  
181 expressed genes as well as lowly dispersed genes [4]. To this end, Granatum has a step to remove  
182 these genes. The user can interactively select both the average expression level threshold and the  
183 dispersion threshold (Figure 3D). The dispersion calculation and negative binomial model fitting  
184 are calculated by modifying the output of the Monocle package [3]. We have customized the  
185 visualization code to enhance integration with the other components, by setting up the threshold  
186 selection sliders and number of genes statistics message on the Granatum web page (Figure 3D).  
187 On the mean-dispersion plot, each gene is represented by a point, where the x-axis is the mean of  
188 the expression levels after log transformation, and the y-axis is the dispersion factor calculated  
189 from a negative binomial model. The preserved genes are highlighted as black and the genes to be

190 removed are labeled as gray colors. The number of genes before and after filtering are also  
191 displayed.

## 192 **Clustering**

193 Clustering is a routine heuristic analysis for scRNA-seq data. Granatum selects five commonly used  
194 algorithms: non-negative matrix factorization [14], k-means, k-means combined with correlation t-  
195 SNE, hierarchical clustering (hclust), and hclust combined with correlation t-SNE. The number of  
196 clusters may be set manually, or automatically determined using an elbow-point finding algorithm  
197 (Methods, Figure 4A). For the latter approach, the algorithm will attempt to cluster samples with  
198 number of clusters ( $k$ ) ranging from 2 to 10, and determine the best number by finding the elbow-  
199 point  $k$ .  $k$  indicates the starting point of plateau for explained variance (EV), above which EV  
200 creases only minimally. If hclust is selected, a heatmap with hierarchical grouping and  
201 dendrograms be shown in a pop-up window (Figure 4B).

202 Next, the resulting cluster labels obtained above, are then super-imposed onto the two  
203 unsupervised PCA and correlation t-SNE plots (Figure 4A). The user can also represent user-defined  
204 labels in the sample metadata as different colors in these plots. By comparing the two sets of  
205 labels, the users can quickly check the concordance between the prior metadata labels and the  
206 computed clusters.

## 207 **Differential expression**

208 After obtaining a set of clusters, it is intuitively important to identify genes that are differentially  
209 expressed between any two clusters. Granatum uses the state-of-the-art SCDE method for its

210 single-cell DE analysis [20]. The DE comparison is performed in a pair-wise fashion when more than  
211 two clusters are present. This step is computationally time and memory consuming. To shorten  
212 computation time, a user can select the number of cores for parallelization on multi-core machines  
213 (Figure 5A). When SCDE is completed, tabbed tables show the genes sorted by their Z-scores, along  
214 with the model coefficients (Figure 5B). As another feature to empower the users, the gene  
215 symbols are linked to their corresponding GeneCards pages ([www.genecards.org](http://www.genecards.org)) [26]. The DE  
216 results can be downloaded as a CSV file via the "Download CSV table" button.

217 To investigate the collective biological functions of these genes, the user can further perform Gene  
218 Set Enrichment Analysis (GSEA) with either KEGG pathways or Gene Ontology (GO) terms (circled  
219 blue in Figure 5B) [27–30]. We have employed a very intuitive bubble-plot to visualize the GSEA  
220 results, where the vertical position of the bubble indicates the enrichment score of the gene sets,  
221 and the size of the bubble indicates number of genes in that set (KEGG pathway or GO term)  
222 (Figure 5C).

## 223 **Protein network visualization**

224 Protein-protein interaction (PPI) network gives straightforward and systematic understanding of  
225 the connections between these differentially expressed genes. Granatum selects the top K (default  
226 K=200) genes in the DE results, and super impose the PPI network on them. Genes that are not  
227 connected to any other genes in the list are removed from the PPI network. We use visNetwork to  
228 enable the interactive display of the graph [10]. The user can freely rearrange the graph by  
229 dragging the nodes to the desired location, and reconfiguring the layout to achieve good visibility

230 of the modules (via elastic-spring physics simulation) (Figure 6A). In this interactive graph, the Z-  
231 scores are mapped as colors on the nodes where red indicates up-regulation and blue indicates  
232 down-regulation.

## 233 **Pseudo-time construction**

234 Granatum has included the Monocle algorithm, a widely-used method to reconstruct a pseudo-  
235 timeline for the samples [3]. Monocle uses the Reversed Graph Embedding algorithm to learn the  
236 structure of the data, and the Principal Graph algorithm to find the time-lines and branching points  
237 of the samples. We superimpose the timeline on the samples scatter-plot projected on the two  
238 components of the learned projection matrix. The user may map any pre-defined labels or numeric  
239 assays provided in the metadata sheet on to the scatter-plot (Figure 6B). The plotting functions are  
240 adapted from the visualization code in Monocle.

## 241 **Discussion**

242 The field of scRNA-seq is fast-evolving both in terms of the development of instrumentation and  
243 the innovation of computational methods. However, it becomes exceedingly hard for a wet-lab  
244 researcher without formal bioinformatics training to catch up with the latest iterations of  
245 algorithms [5]. This poses major barriers to them and many resort to sending their generated data  
246 to third-party bioinformaticians, before they are able to visualize the data themselves. This  
247 segregation often prolongs the research cycle time, as it often takes significant effort to maintain  
248 effective communications between the two sides (sometimes even more complicated with a third

249 party of the genomics core). Also, issues with the experimentations do not get the chance to be  
250 spotted early enough, to avoid significance loss of time and cost in the projects. It is thus very  
251 attractive to have a non-programming graphical application which includes state-of-the-art  
252 algorithms as routine procedures, in the hands of the bench-scientist who generate the scRNA-seq  
253 data.

254 Granatum is our attempt to fill this void. It is to our knowledge the first solution that aims to cover  
255 the entire scRNA-seq workflow with an intuitive, step-wise graphical user interface. Throughout  
256 the development process our priority has been to make sure that it is fully accessible to  
257 researchers with no programming experiments. We have strived to achieve that the plots and  
258 tables are self-explanatory, interactive and visually pleasant. We have sought inputs from our  
259 single-cell bench-side collaborators, to ensure that the terminologies are easy to understand by  
260 them. We also supplement Granatum with a manual and video that guide the users through the  
261 entire workflow, using example datasets. Currently Granatum targets users who have their  
262 expression matrices and metadata sheets ready. However, we are developing the next version of  
263 Granatum, which will handle the entire scRNA-seq data processing and analysis pipeline including  
264 FASTQ quality control, alignment, and expression quantification. In the future, we will enrich  
265 Granatum with capacities to analyze and integrate other types of genomics data in single cells,  
266 such as exome-seq and methylation data.

## 267 **Conclusions**

268 We have developed a graphical web application called Granatum, which enables bench  
269 researchers with no programming expertise to analyze state-of-the-art scRNA-Seq data. This tool  
270 offers many interactive features to allow routine computational procedures with a great amount  
271 of flexibility. We expect that this platform will empower the bench-side researchers with more  
272 independence in the fast-evolving single cell genomics field.

## 273 **Figure legends**

274 **Figure 1: Granatum workflow.** Granatum is built with the Shiny framework, which supports both  
275 front-end and the back-end. The user uploads one or more expression matrices with  
276 corresponding metadata for samples. The back-end stores data separately for each individual user,  
277 and invokes third-party libraries on demand.

278 **Figure 2: The batch-effect removal steps.** A box-plot is shown for the samples. The colors indicate  
279 the batch labels, which can be selected using the batch factor selection box circled in blue. In cases  
280 where more than 96 cells are present in the data, only a random sample of 96 cells are shown. The  
281 user can re-sample the data by clicking the “Re-plot random 96 cells” button.

282 **Figure 3: The outlier removal, normalization and gene filtering steps.** A) The main interface of the  
283 outlier removal step. The two scatter-plots are the PCA and correlation t-SNE plots, with colors  
284 indicate the cell labels (box circled in blue). The metadata table (circled in red) shows the labels for



285 the selected cells. B) The pop-up window for automatic outlier detection options after the “auto-  
286 identify” button is clicked. C) The normalization step. The box-plot shows the expression levels of  
287 each cell in log-scale. In cases where more than 96 cells are present in the data, only a random  
288 sample of 96 cells are shown. D) The Gene filtering step. The y-axis of the scatter-plot is the  
289 empirical dispersion, estimated by a negative binomial model. The x-axis is the log mean  
290 expression of each gene. The user can change the threshold by dragging the two sliders circled in  
291 blue.

292 **Figure 4: The Clustering step.** A) Main interface. PCA and t-SNE plots are shown with colors  
293 mapped to user-selected sample labels. After clustering, samples are marked with their assigned  
294 cluster numbers. The user can either choose a specific number of clusters or let Granatum  
295 compute the best number of clusters. B) When Hclust (Euclidean) is selected, a pop-up window will  
296 show a heatmap of the expression matrix with dendrograms.

297 **Figure 5: The Differential expression (DE) step.** A) Before running DE, the user may select the  
298 number of cores to use for speed. B) After DE, top differentially expressed genes for each pair of  
299 clusters are shown. Gene Set Enrichment Analysis (GSEA) can be performed, using either KEGG  
300 pathways or GO terms (circled in blue). C) The results of GSEA. The pathways on the x-axis are  
301 sorted top 20 enriched gene sets. The height of the bubble indicates the absolute normalized  
302 enrichment score, and the size of the bubble indicates the number of genes in the set.

303 **Figure 6: The Protein network and Pseudo-time construction steps.** A) The Protein network step.  
304 The A tabbed panel shows the connected gene modules on the PPI network between each pair of

305 clusters. The color on each node (gene) indicates its Z-score in the differential expression test. Red  
306 and blue colors indicates up- and down- regulation. B) The Pseudo-time construction step.  
307 Monocle algorithm is customized to visualize the paths among individual cells. The user can  
308 represent sample labels from the metadata as colors in the plot.

## 309 **Tables**

310 **Table 1: Comparison of existing single-cell analysis pipelines.**

## 311 **Declarations**

### 312 **Ethics approval and consent to participate**

313 Not Applicable.

### 314 **Consent for publication**

315 Not Applicable.

### 316 **Availability of data and material**

317 Granatum can be visited at: <http://garmiregroup.org/granatum/app>

318 A demonstration video can be found at: <http://garmiregroup.org/granatum/video>

### 319 **Competing interests**

320 The authors declared no conflict of interest.

## 321 **Funding**

322 This research was supported by grants K01ES025434 awarded by NIEHS through funds provided by  
323 the trans-NIH Big Data to Knowledge (BD2K) initiative (<http://datascience.nih.gov/bd2k>), P20  
324 COBRE GM103457 awarded by NIH/NIGMS, NICHD R01HD084633 and NLM R01LM012373 and  
325 Hawaii Community Foundation Medical Research Grant 14ADVC-64566 to LX Garmire.

## 326 **Authors' contributions**

327 LXG envisioned the project. XZ developed the majority of the pipeline. TW and AT assisted in  
328 developing the pipeline. TW documented the user manual and performed packaging. XZ, TW and  
329 LXG wrote the manuscript. All authors have read, revised, and approved the final manuscript.

## 330 **Acknowledgements**

331 We thank Drs. Michael Ortega and Paula Benny for providing valuable feedback during testing the  
332 tool. We also thank other group members in Garmire group for suggestions in the tool  
333 development.

## 334 **List of abbreviations**

335 **scRNA-seq:** Single-cell high-throughput RNA sequencing

336 **DE:** differential expression

337 **GSEA:** Gene-set enrichment analysis

338 **KEGG:** Kyoto Encyclopedia of Genes and Genomes

- 339 **GO:** Gene ontology
- 340 **PCA:** Principal component analysis
- 341 **t-SNE:** t-Distributed Stochastic Neighbor Embedding
- 342 **NMF:** Non-negative matrix factorization
- 343 **Hclust:** Hierarchical clustering
- 344 **PPI:** Protein-protein interaction

## 345 **References**

- 346 1. Patel AP, Tirosh I, Trombetta JJ, Shalek AK, Gillespie SM, Wakimoto H, et al. Single-cell RNA-seq  
347 highlights intratumoral heterogeneity in primary glioblastoma. *Science* (80-. ). [Internet].  
348 Department of Neurosurgery, Massachusetts General Hospital and Harvard Medical School,  
349 Boston, MA 02114, USA. Department of Pathology and Center for Cancer Research, Massachusetts  
350 General Hospital and Harvard Medical School, Boston, MA 02114, USA. *Broad I*; 2014;344:1396–  
351 401. Available from: <http://dx.doi.org/10.1126/science.1254257>
- 352 2. Lewis BP, Burge CB, Bartel DP. Conserved seed pairing, often flanked by adenosines, indicates  
353 that thousands of human genes are microRNA targets. *Cell*. Elsevier; 2005;120:15–20.
- 354 3. Trapnell C, Cacchiarelli D, Grimsby J, Pokharel P, Li S, Morse M, et al. The dynamics and  
355 regulators of cell fate decisions are revealed by pseudotemporal ordering of single cells. *Nat.*

- 356 Biotechnol. Nature Research; 2014;32:381–6.
- 357 4. Brennecke P, Anders S, Kim JK, Kołodziejczyk AA, Zhang X, Proserpio V, et al. Accounting for  
358 technical noise in single-cell RNA-seq experiments. Nat. Methods. Nature Publishing Group; 2013;
- 359 5. Poirion OB, Zhu X, Ching T, Garmire L. Single-Cell Transcriptomics Bioinformatics and  
360 Computational Challenges [Internet]. Front. Genet. . 2016. p. 163. Available from:  
361 <http://journal.frontiersin.org/article/10.3389/fgene.2016.00163>
- 362 6. Team RC. R: A language and environment for statistical computing. R Foundation for Statistical  
363 Computing, Vienna, Austria. 2015, URL [http. www. R-project. org](http://www.R-project.org). 2016;
- 364 7. McCarthy DJ, Campbell KR, Lun ATL, Wills QF. scater: pre-processing, quality control,  
365 normalisation and visualisation of single-cell RNA-seq data in R. bioRxiv [Internet]. Cold Spring  
366 Harbor Labs Journals; 2016; Available from: <http://biorxiv.org/content/early/2016/08/15/069633>
- 367 8. RStudio, Inc. Easy web applications in R. 2013.
- 368 9. Attali D. shinyjs: Easily Improve the User Experience of Your Shiny Apps in Seconds [Internet].  
369 2016. Available from: <https://cran.r-project.org/package=shinyjs>
- 370 10. Almende B.V., Thieurmel B. visNetwork: Network Visualization using “vis.js” Library [Internet].  
371 2016. Available from: <https://cran.r-project.org/package=visNetwork>
- 372 11. Xie Y. DT: A Wrapper of the JavaScript Library “DataTables” [Internet]. 2016. Available from:  
373 <https://cran.r-project.org/package=DT>

- 374 12. Sievert C, Parmer C, Hocking T, Chamberlain S, Ram K, Corvellec M, et al. plotly: Create  
375 Interactive Web Graphics via “plotly.js” [Internet]. 2016. Available from: [https://cran.r-](https://cran.r-project.org/package=plotly)  
376 [project.org/package=plotly](https://cran.r-project.org/package=plotly)
- 377 13. Wickham H. ggplot2: Elegant Graphics for Data Analysis [Internet]. Springer-Verlag New York;  
378 2009. Available from: <http://ggplot2.org>
- 379 14. Zhu X, Ching T, Pan X, Weissman S, Garmire L. Detecting heterogeneity in single-cell RNA-Seq  
380 data by non-negative matrix factorization. PeerJ Prepr. PeerJ Inc. San Francisco, USA;  
381 2016;4:e1839v1.
- 382 15. Brunet J-P, Tamayo P, Golub TR, Mesirov JP. Metagenes and molecular pattern discovery using  
383 matrix factorization. Proc. Natl. Acad. Sci. [Internet]. 2004;101:4164–9. Available from:  
384 <http://www.pnas.org/content/101/12/4164.abstract>
- 385 16. Gaujoux R, Seoighe C. Algorithms and framework for nonnegative matrix factorization (NMF).  
386 2010.
- 387 17. Lloyd S. Least squares quantization in PCM. IEEE Trans. Inf. theory. IEEE; 1982;28:129–37.
- 388 18. Murtagh F, Contreras P. Methods of hierarchical clustering. arXiv Prepr. arXiv1105.0121. 2011;
- 389 19. Krijthe J. Rtsne: T-Distributed Stochastic Neighbor Embedding using Barnes-Hut  
390 Implementation. R Packag. version 0.10, URL [http://CRAN.R-project.org/package= Rtsne](http://CRAN.R-project.org/package=Rtsne). 2015;
- 391 20. Kharchenko P V, Silberstein L, Scadden DT. Bayesian approach to single-cell differential

- 392 expression analysis. *Nat. Methods*. Nature Publishing Group; 2014;11:740–2.
- 393 21. Sergushichev A. An algorithm for fast preranked gene set enrichment analysis using cumulative  
394 statistic calculation. *bioRxiv* [Internet]. Cold Spring Harbor Labs Journals; 2016; Available from:  
395 <http://biorxiv.org/content/early/2016/06/20/060012>
- 396 22. Gardeux V, David F, Shajkofci A, Schwalie PC, Deplancke B. ASAP: a Web-based platform for the  
397 analysis and inter-active visualization of single-cell RNA-seq data. *bioRxiv*. Cold Spring Harbor Labs  
398 Journals; 2016;96222.
- 399 23. Hicks SC, Teng M, Irizarry RA. On the widespread and critical impact of systematic bias and  
400 batch effects in single-cell RNA-Seq data. *bioRxiv*. Cold Spring Harbor Labs Journals; 2015;25528.
- 401 24. Bolstad BM, Irizarry RA, Åstrand M, Speed TP. A comparison of normalization methods for high  
402 density oligonucleotide array data based on variance and bias. *Bioinformatics*. Oxford Univ Press;  
403 2003;19:185–93.
- 404 25. Love MI, Huber W, Anders S. Moderated estimation of fold change and dispersion for RNA-Seq  
405 data with DESeq2. *bioRxiv*. Cold Spring Harbor Labs Journals; 2014;
- 406 26. Rebhan M, Chalifa-Caspi V, Prilusky J, Lancet D. GeneCards: integrating information about  
407 genes, proteins and diseases. *Trends Genet*. Elsevier Current Trends; 1997;13:163.
- 408 27. Subramanian A, Tamayo P, Mootha VK, Mukherjee S, Ebert BL, Gillette MA, et al. Gene set  
409 enrichment analysis: a knowledge-based approach for interpreting genome-wide expression  
410 profiles. *Proc. Natl. Acad. Sci. National Acad Sciences*; 2005;102:15545–50.

- 411 28. Kanehisa M, Furumichi M, Tanabe M, Sato Y, Morishima K. KEGG: new perspectives on  
412 genomes, pathways, diseases and drugs. *Nucleic Acids Res. Oxford Univ Press*; 2017;45:D353--  
413 D361.
- 414 29. Consortium GO, others. Gene ontology consortium: going forward. *Nucleic Acids Res. Oxford*  
415 *Univ Press*; 2015;43:D1049--D1056.
- 416 30. Ashburner M, Ball CA, Blake JA, Botstein D, Butler H, Cherry JM, et al. Gene Ontology: tool for  
417 the unification of biology. *Nat. Genet. Nature Publishing Group*; 2000;25:25–9.
- 418
- 419



# A

## Protein network

1 vs. 2   1 vs. 3   2 vs. 3

Z-scores (blue = Down-regulation, red = Up-regulation)

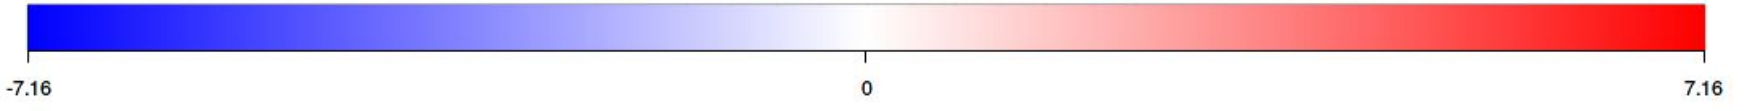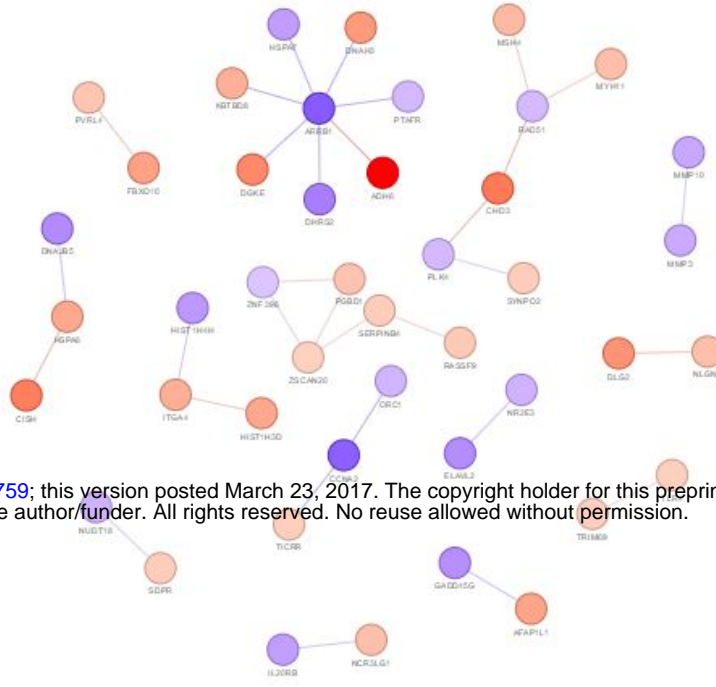

bioRxiv preprint doi: <https://doi.org/10.1101/110759>; this version posted March 23, 2017. The copyright holder for this preprint (which was not certified by peer review) is the author/funder. All rights reserved. No reuse allowed without permission.

Proceed

# B

## Pseudo-time construction

Cell labels

Type

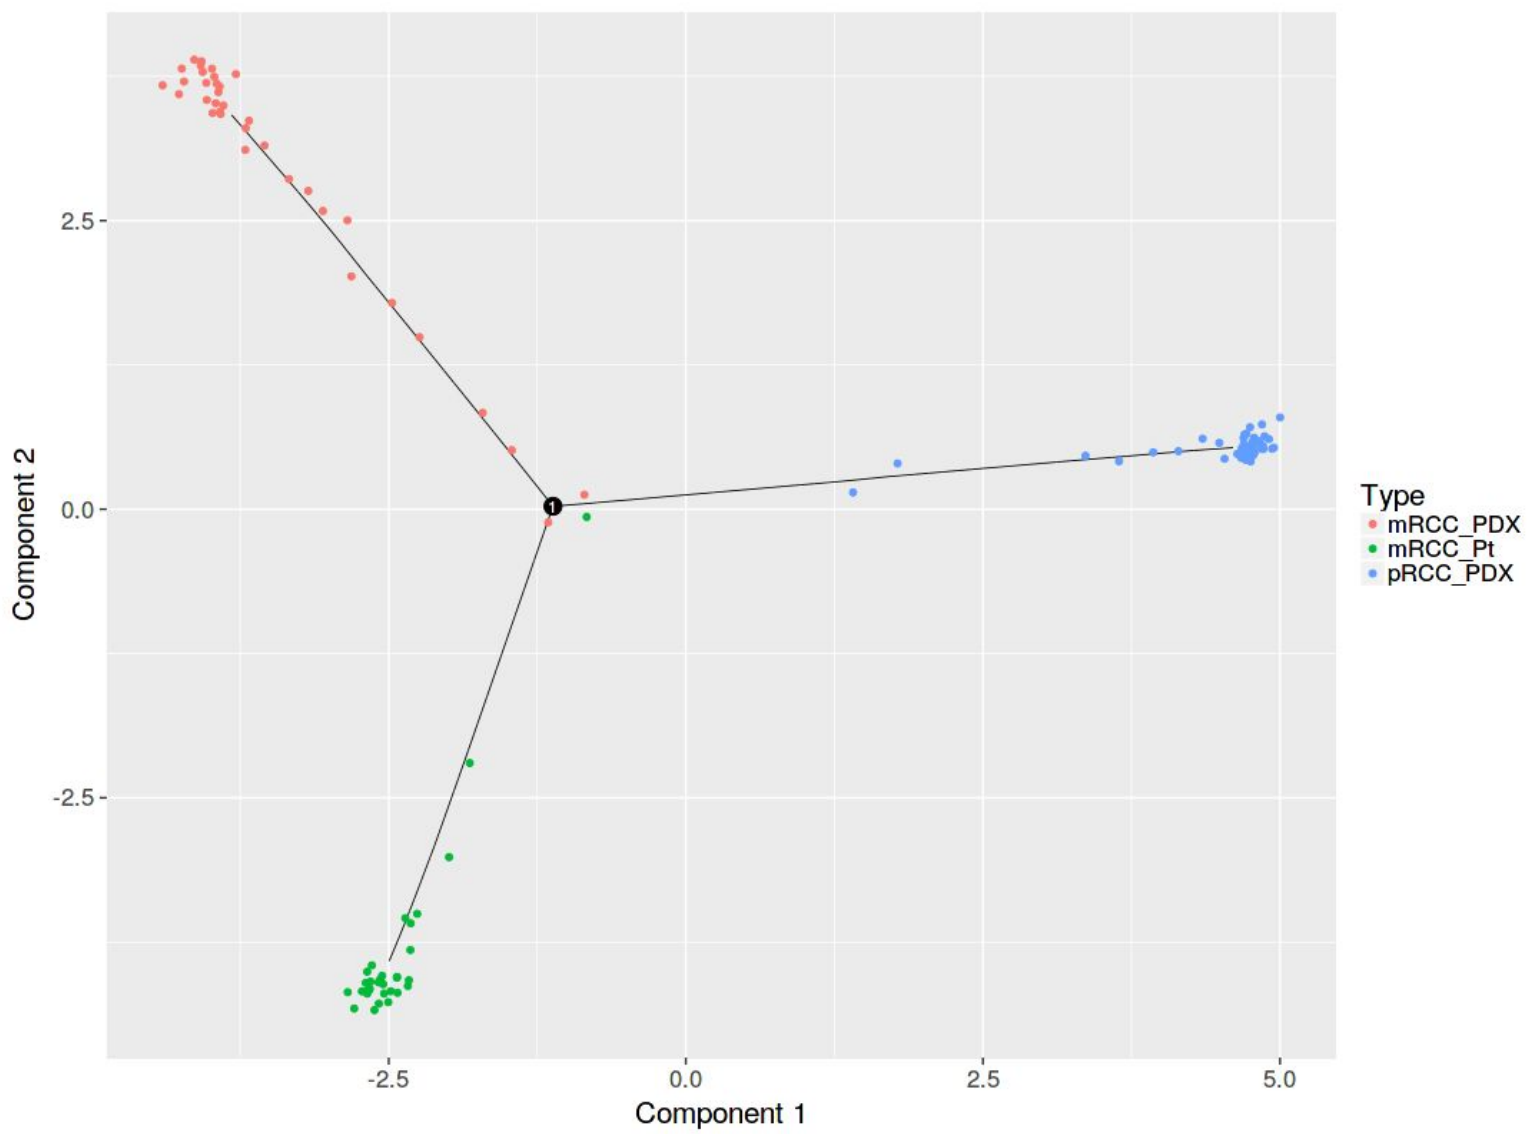

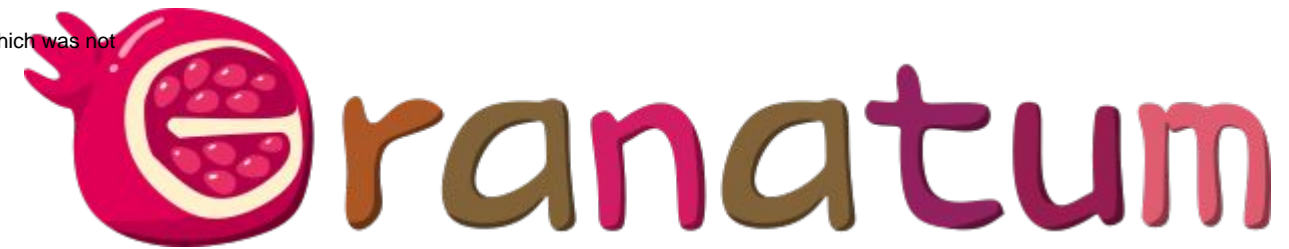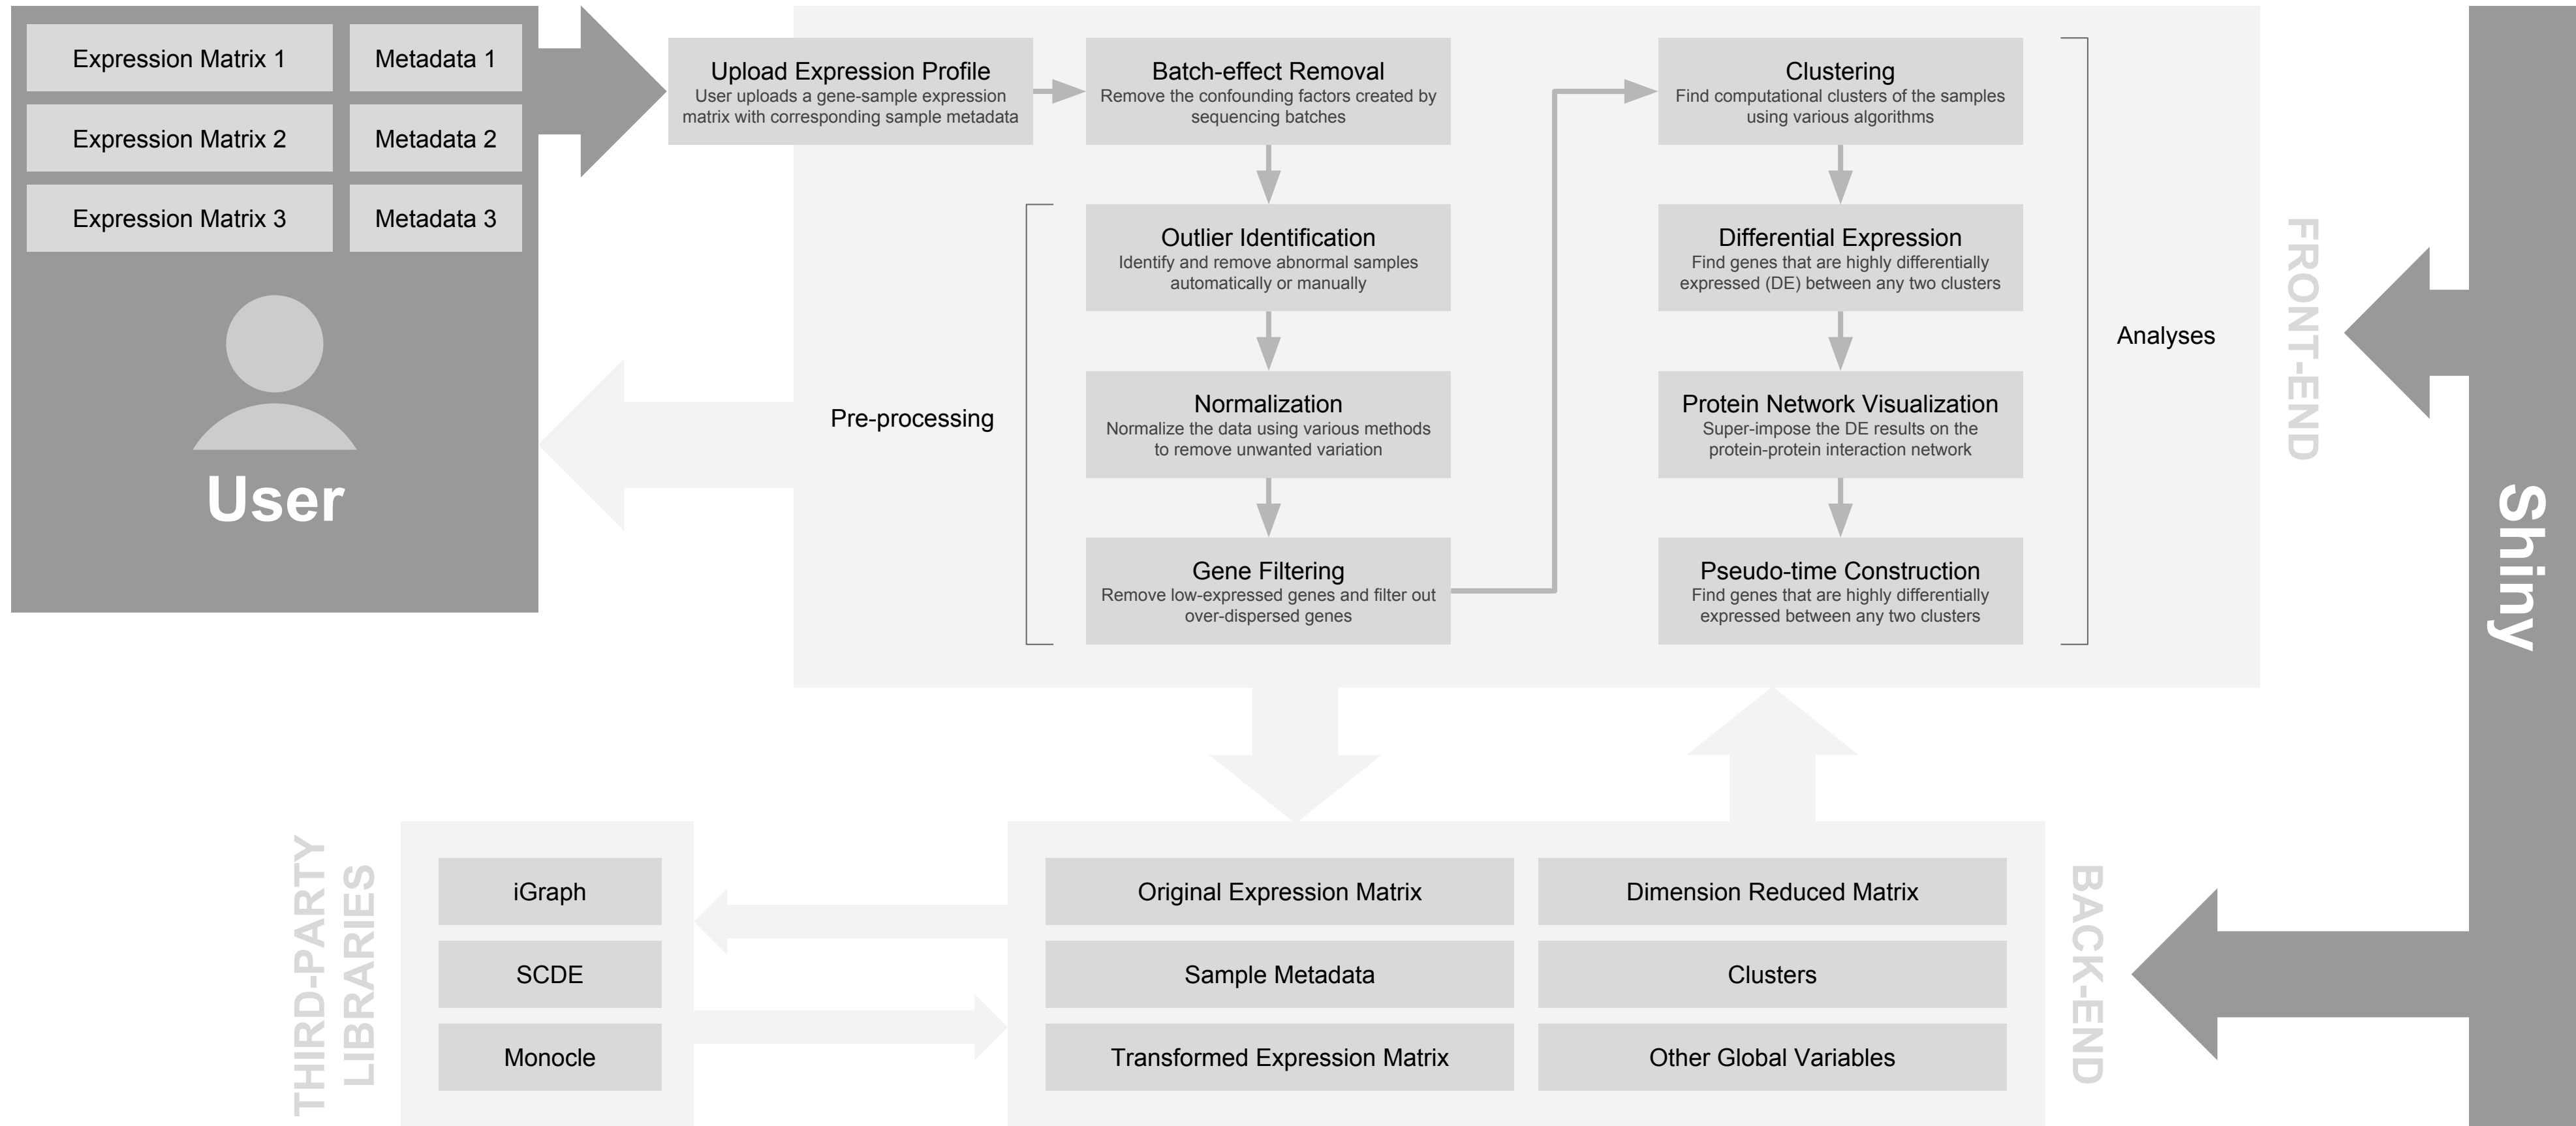

# Batch-effect removal

Data generated in batches may have confounding effects on results. To address this, select the factor that distinguishes cells in different batches, e.g., "Dataset", and check the underlying box before clicking a normalization button.

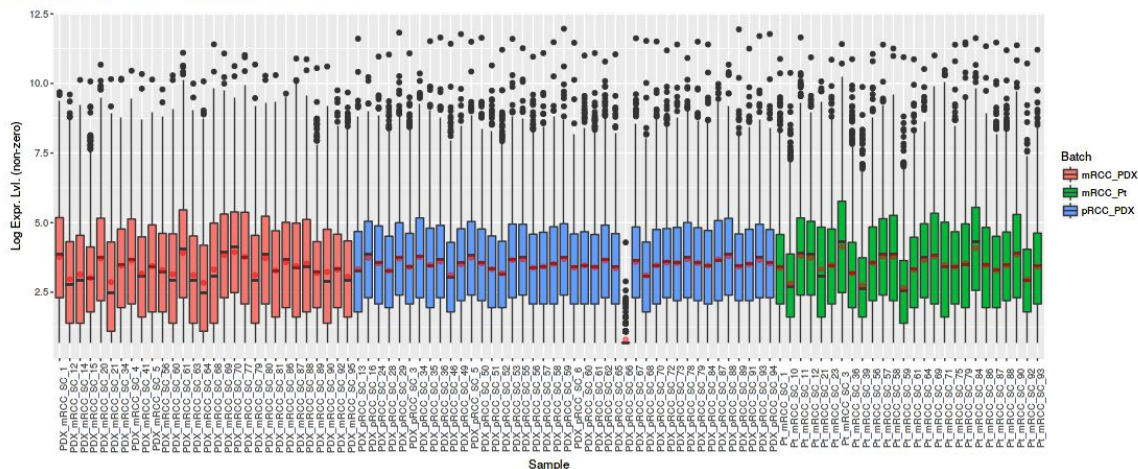

Re-plot random 96 cells

Batch factor:

Type

Remove batch effect

Reset

Submit

A

## Outlier removal

Cell labels (from metadata)

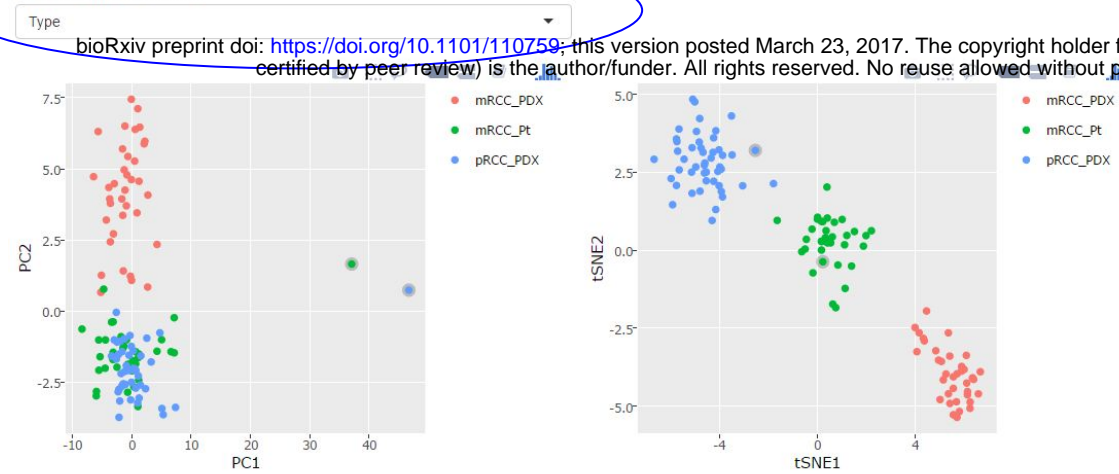 Cluster using only top expressed genes





Selected cells:

| id             | Type     | State | Pt_PDX | Mapped_reads | GSM        | SRX        | SRR        |
|----------------|----------|-------|--------|--------------|------------|------------|------------|
| Pt_mRCC_SC_5   | mRCC_Pt  | mRCC  | Pt     | 36234        | GSM1887310 | SRX1253756 | SRR2431431 |
| PDX_pRCC_SC_66 | pRCC_PDX | pRCC  | PDX    | 7603         | GSM1887283 | SRX1253736 | SRR2431411 |

Showing 1 to 2 of 2 entries

C

## Normalization

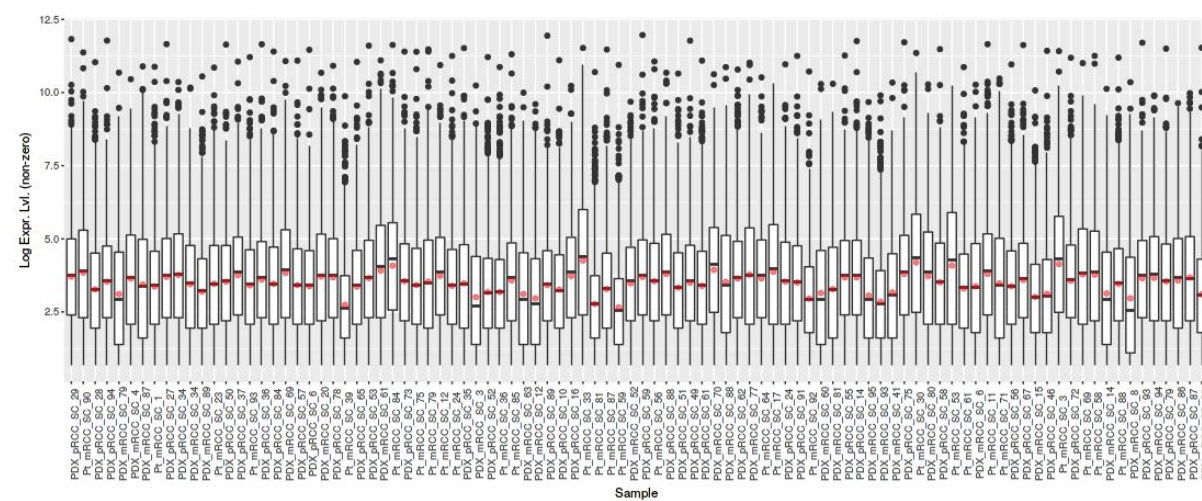






B

## Outlier removal

Z-score threshold

4

Number of Outliers

1

Using

- Z-score threshold
- Fixed number of samples

According to

- PCA
- Correlation t-SNE



D

## Gene filtering

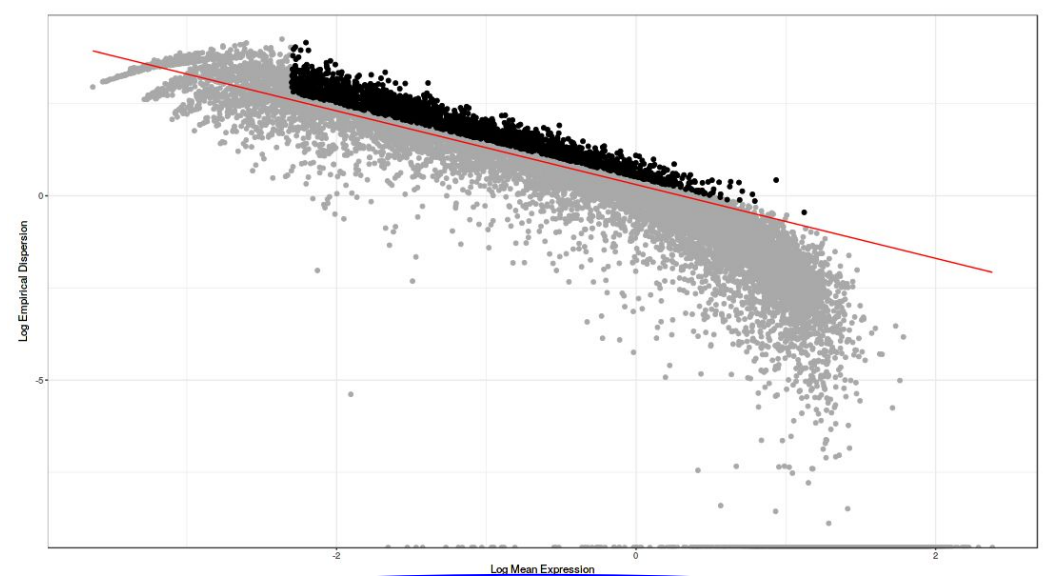

Log Mean Expression Threshold

-5.63

-2.3

Dispersion Fit Threshold

0

1.22

Starting number of genes:  
19924Post-filtering number of genes:  
2252

# A

## Clustering

Cell labels

Type

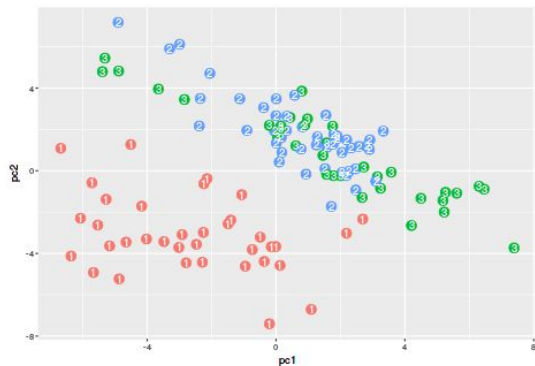

● mROC\_PDX  
● mROC\_Pt  
● pROC\_PDX

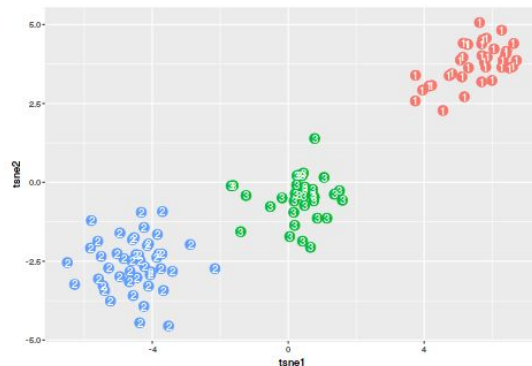

● mROC\_PDX  
● mROC\_Pt  
● pROC\_PDX

Clustering method

- Non-negative matrix factorization
- K-means (Euclidean)
- K-means (correlation t-SNE)
- Hierarchical clustering (Euclidean) with heatmap
- Hierarchical clustering (correlation t-SNE)

Automatically choose the number of clusters (might take long time)

Number of clusters

3

Run clustering

Submit

# B

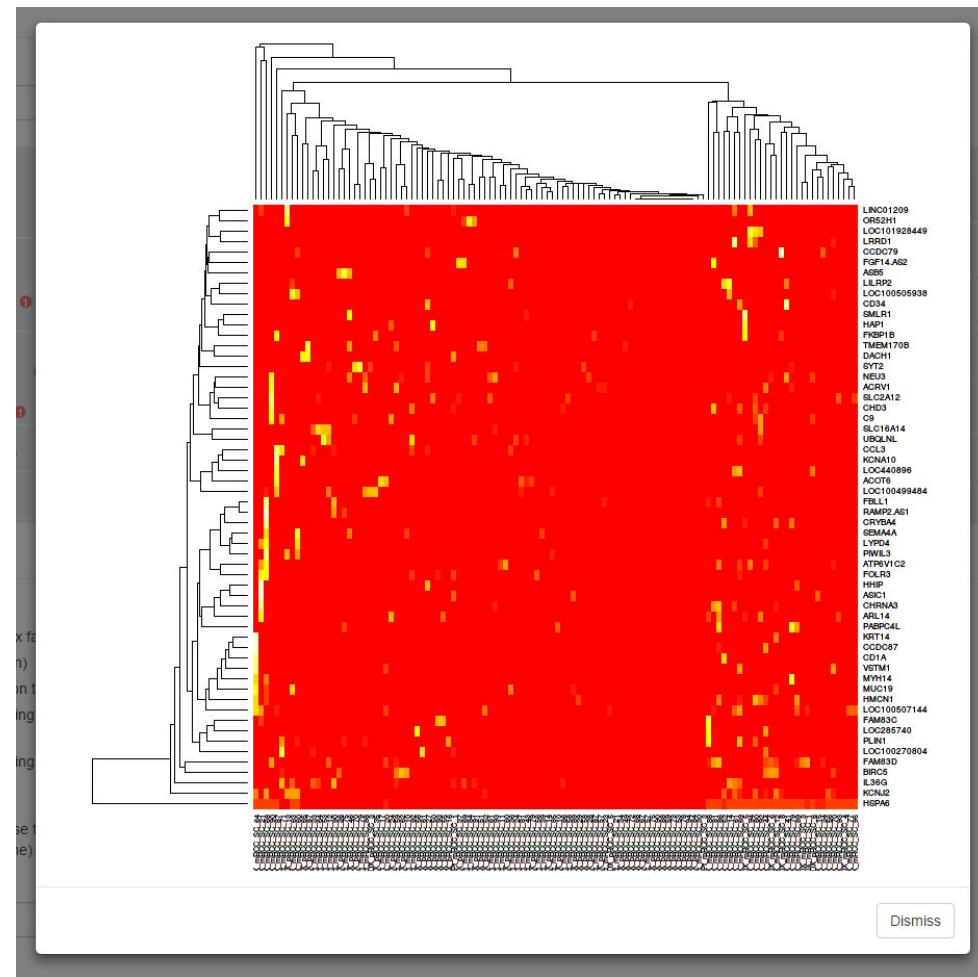

Dismiss

# A

## Differential expression

Number of processor cores

1

Start analysis

# C

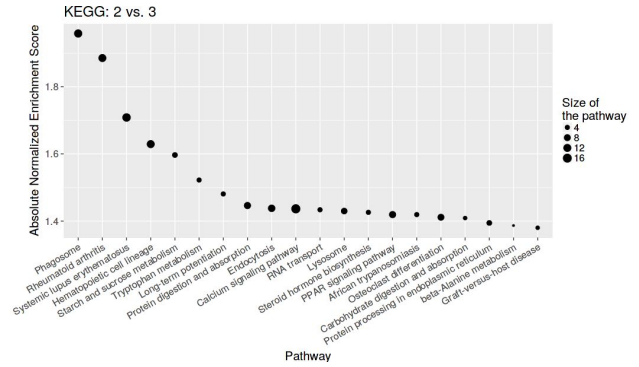

# B

## Differential expression

Cell labels

Type

Numbers in tabs below indicate which clusters have been compared. Genes are sorted most to least differentially expressed by absolute Z-score value.

1 vs. 2 1 vs. 3 2 vs. 3

Show 10 entries

Search:

| gene    | lb         | mle        | ub         | ce         | Z         | cZ        |
|---------|------------|------------|------------|------------|-----------|-----------|
| CDH6    | -14.916794 | -5.746980  | -4.563778  | -4.563778  | -7.160847 | -6.337979 |
| HSPA6   | 5.070865   | 6.338581   | 14.536479  | 5.070865   | 7.160813  | 6.337979  |
| KRT81   | 12.001047  | 12.930705  | 13.437792  | 12.001047  | 7.160813  | 6.337979  |
| CSF2    | 11.493960  | 12.465876  | 13.141991  | 11.493960  | 7.160809  | 6.337979  |
| TCN1    | -13.353277 | -12.803934 | -8.028869  | -8.028869  | -7.157471 | -6.337979 |
| DKK1    | 10.986874  | 12.043304  | 12.677162  | 10.986874  | 7.155977  | 6.337979  |
| SLC15A1 | -13.564563 | -13.057477 | -6.296324  | -6.296324  | -7.155594 | -6.337979 |
| SAMD5   | -12.592648 | -12.043304 | -11.324932 | -11.324932 | -7.146775 | -6.337979 |
| MEG3    | -12.592648 | -11.874275 | -11.155903 | -11.155903 | -7.140434 | -6.337979 |
| DCAF4L1 | 6.761153   | 12.423619  | 13.015220  | 6.761153   | 6.836788  | 6.028128  |

gene

lb

mle

ub

ce

Z

cZ

Showing 1 to 10 of 2,252 entries

Previous

1

2

3

4

5

...

226

Next

KEGG enrichment

Gene Ontology enrichment

Download CSV table

Submit

| Software             | GUI driven workflow | Live web site | Video tutorial | Interactive plots | Batch-effect removal | Outlier removal | Normalization | Over-dispersed genes identification | Clustering analysis | Differential expression analysis | Gene-set enrichment analysis | Network analysis | Pseudo-time construction | Citation               |
|----------------------|---------------------|---------------|----------------|-------------------|----------------------|-----------------|---------------|-------------------------------------|---------------------|----------------------------------|------------------------------|------------------|--------------------------|------------------------|
| Granatum             | ✓                   | ✓             | ✓              | ✓                 | ✓                    | ✓               | ✓             | ✓                                   | ✓                   | ✓                                | ✓                            | ✓                | ✓                        |                        |
| SCRAT / TSCAN / GSCA | ✓                   | (*)           | ✓              | ✓                 | ✗                    | ✓               | ✓             | ✗                                   | ✓                   | ✓                                | ✓                            | ✗                | ✓                        | Ji et al. 2016         |
| ASAP                 | ✓                   | ✓             | ✗              | ✓                 | ✗                    | ✗               | ✓             | ✓                                   | ✓                   | ✓                                | ✓                            | ✗                | ✗                        | Gardeux et al. 2016    |
| Sake                 | ✓                   | ✓             | ✗              | ✓                 | ✗                    | ✗               | ✓             | ✓                                   | ✓                   | ✓                                | ✓                            | ✓                | ✗                        | NA                     |
| Singular             | ✗                   | ✗             | ✗              | ✓                 | ✗                    | ✓               | ✗             | ✗                                   | ✓                   | ✓                                | ✗                            | ✗                | ✗                        | Fluidigm Corp. 2015    |
| Cell Ranger / Loupe  | ✗                   | ✗             | ✓              | ✓                 | ✓                    | ✓               | ✓             | ✗                                   | ✓                   | ✓                                | ✗                            | ✗                | ✗                        | Zheng et al. 2017      |
| Seurat               | ✗                   | ✗             | ✗              | ✗                 | ✗                    | ✓               | ✓             | ✗                                   | ✓                   | ✓                                | ✗                            | ✗                | ✗                        | Satija et al. 2016     |
| Scater               | ✗                   | ✗             | ✗              | ✓                 | ✓                    | ✓               | ✓             | ✗                                   | ✓                   | ✗                                | ✗                            | ✗                | ✗                        | McCarthy et al. 2017   |
| Monocle              | ✗                   | ✗             | ✗              | ✗                 | ✗                    | ✓               | ✓             | ✓                                   | ✓                   | ✓                                | ✗                            | ✗                | ✓                        | Trapnell et al. 2014   |
| SCDE / PAGODA        | ✗                   | (**)          | (***)          | ✓                 | ✓                    | ✓               | ✓             | ✓                                   | ✓                   | ✓                                | ✓                            | ✗                | ✗                        | Kharchenko et al. 2014 |
| Flotilla             | ✗                   | ✗             | ✗              | ✓                 | ✓                    | ✓               | ✗             | ✗                                   | ✓                   | ✓                                | ✓                            | ✓                | ✗                        | NA                     |
| Sincell              | ✗                   | ✗             | ✗              | ✗                 | ✗                    | ✗               | ✗             | ✗                                   | ✓                   | ✗                                | ✓                            | ✗                | ✓                        | Juliá et al. 2015      |
| Sincera              | ✗                   | ✗             | ✗              | ✗                 | ✗                    | ✗               | ✓             | ✗                                   | ✓                   | ✓                                | ✓                            | ✓                | ✗                        | Guo et al. 2015        |

(\*) The three components (SCRAT, TSCAN and GSCA) are not integrated.

(\*\*) Results can be shown interactively using a web interface. However, the results themselves have to be pre-computed in R.

(\*\*\*) For the interactive interface only
